# Supplementary material for: Enhanced highly toxic reactive oxygen species levels from iron oxide core–shell mesoporous silica nanocarrier-mediated Fenton reactions for cancer therapy
Source: Royal Society of Chemistry journal article supplement (doi:10.1039/c8tb01731j), 2018-01-01
Supplement: c8tb01731j1.pdf [file c8tb01731j1.pdf]

## Electronic Supporting Information

### Enhanced highly toxic reactive oxygen species levels by iron oxide core-shell mesoporous silica nanocarrier-mediated Fenton reactions for cancer therapy

Kai Sun, Zhiguo Gao, Yu Zhang, Hongshuai Wu, Chaoqun You, Senlin Wang,

Peijing An, Chen Sun, Baiwang Sun\*

School of Chemistry and Chemical Engineering, Southeast University, Nanjing  
210089, People's Republic of China. Fax: +86 25 52090614, Tel: +86 25 52090614, E-  
mail address: [chmsunbw@seu.edu.cn](mailto:chmsunbw@seu.edu.cn)

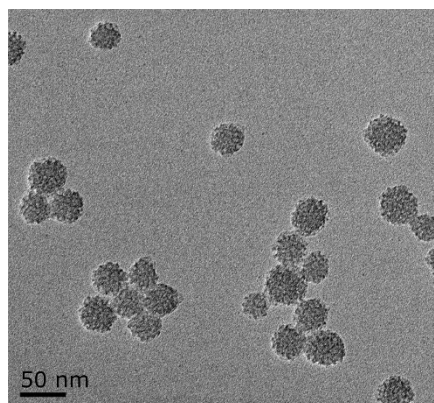

Fig. S1 The TEM image of MSN-TPP-PEG-FA

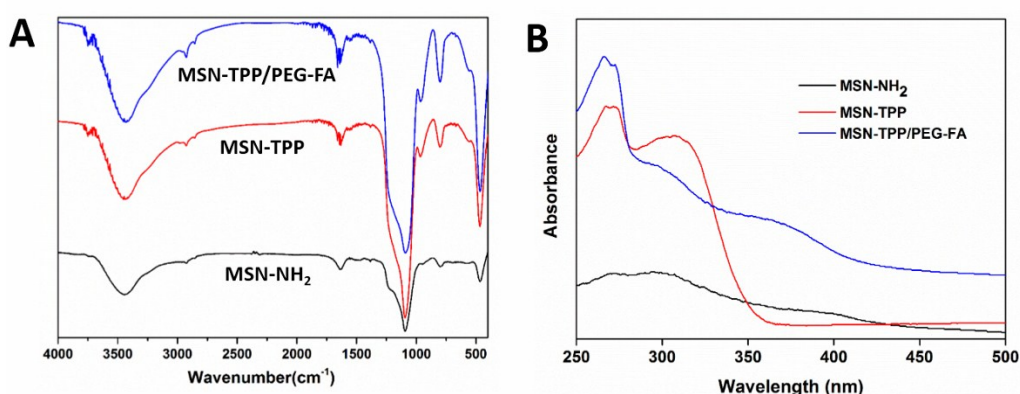

Fig. S2 (A) The FTIR spectra of different MSN materials; (B) The UV-vis spectra of MSN-NH<sub>2</sub>, MSN-TPP and MSN-TPP/PEG-FA.

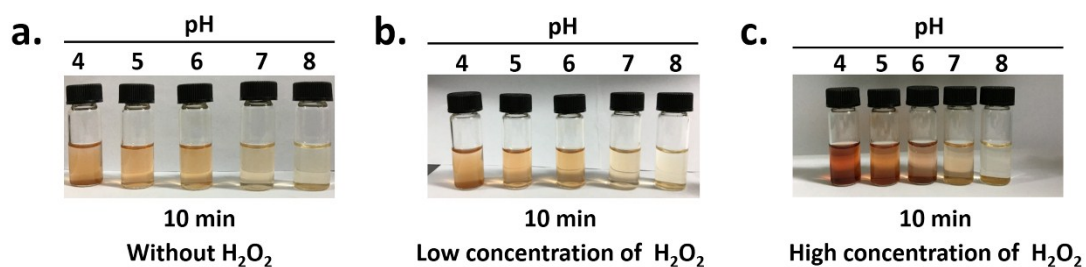

**Fig. S3** Actual pictures of color changes induced by ferric ions released from  $\text{Fe}_3\text{O}_4@MSN\text{-TPP/PEG-FA}$ . (a) Without  $\text{H}_2\text{O}_2$ , (b) low concentration of  $\text{H}_2\text{O}_2$  and (c) high concentration of  $\text{H}_2\text{O}_2$ .

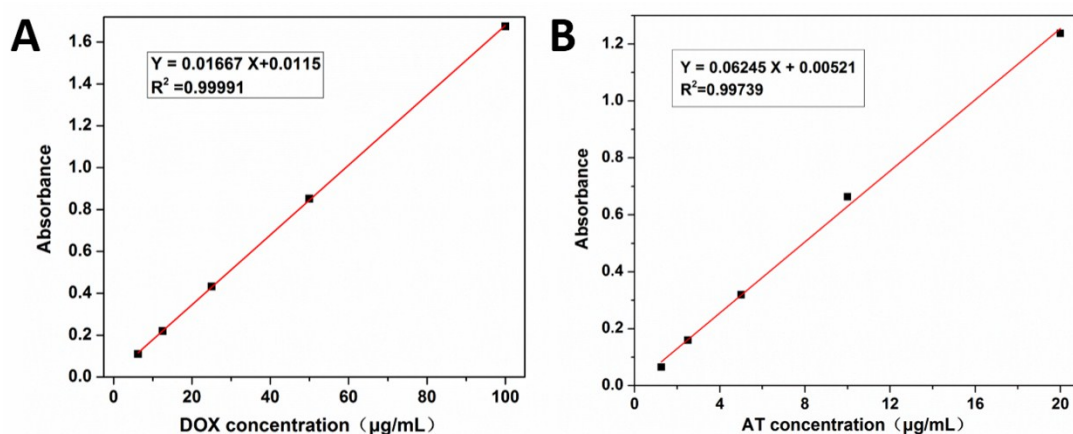

**Fig. S4** Standard calibration curves of DOX (A) and AT (B) in aqueous solution.

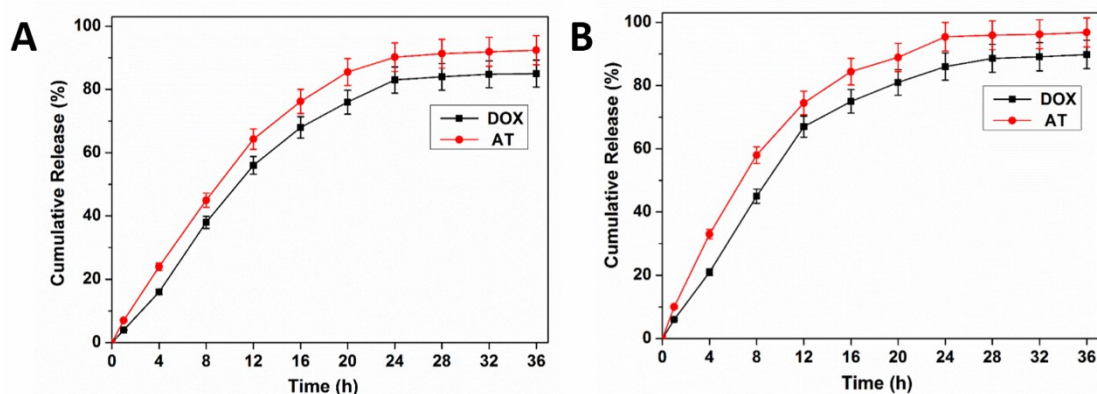

**Fig. S5** Release curves of DOX and AT from  $\text{Fe}_3\text{O}_4@MSN\text{-TPP/PEG-FA}$  in PBS solutions at different pH = 8.0 (A) and pH = 6.8 (B).

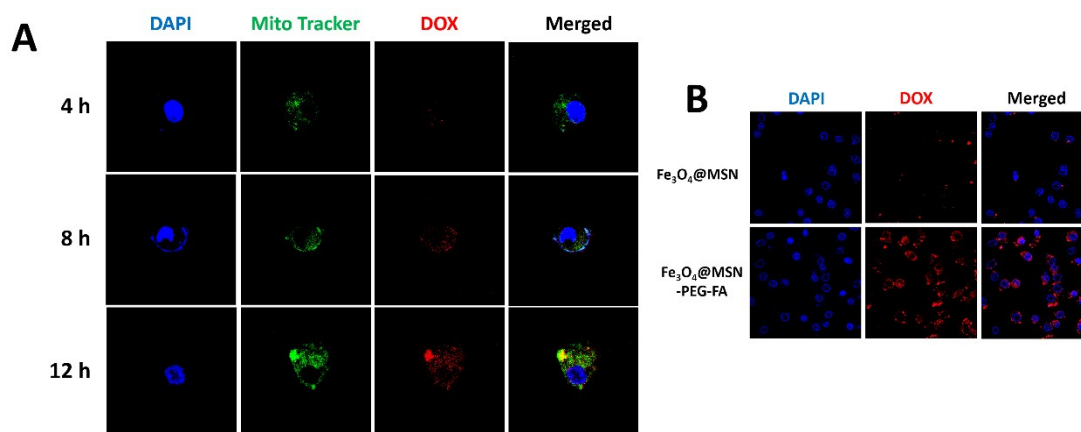

**Fig. S6** (A) Mitochondrial targeting ability of the  $\text{Fe}_3\text{O}_4@\text{MSN}$ -TPP/PEG-FA to MCF-7 cells at different incubation time intervals (4 h, 8 h, 12 h). (B) Binding efficacy of non-FA-conjugated and FA-conjugated  $\text{Fe}_3\text{O}_4@\text{MSN}$  to MCF-7 cells at 6 h of incubation.
